# Supplementary material for: Resorufin based fluorescence ‘turn-on’ chemodosimeter probe for nitroxyl (HNO)
Source: Royal Society of Chemistry journal article supplement (doi:10.1039/c5ra17837a), 2015-01-01
Supplement: c5ra17837a1.pdf [file c5ra17837a1.pdf]

## Supplementary Information

*For*

### Fluorescent ‘turn-on’ Chemodosimeter Probe for Nitrosyl (HNO)

Kondapa Naidu Bobba,<sup>‡a</sup> Ying Zhou,<sup>‡b</sup> Lin E Guo,<sup>b</sup> Tie Nan Zang,<sup>b</sup> Jun Feng Zhang,<sup>\*c</sup> and Sankarprasad Bhuniya<sup>\*ad</sup>

<sup>a</sup> Amrita Centre for Industrial Research & Innovation, Amrita Vishwa Vidyapeetham, Ettimadai, Coimbatore 641112, India. E-mail: [b\\_sankarprasad@cb.amrita.edu](mailto:b_sankarprasad@cb.amrita.edu)

<sup>b</sup> Key Laboratory of Medicinal Chemistry for Natural Resource, School of Chemical Science and Technology, Yunnan University, Kunming 650091, China

<sup>c</sup> College of Chemistry and Chemical Engineering, Yunnan Normal University, Kunming 650500, China, E-mail: [junfengzhang78@aliyun.com](mailto:junfengzhang78@aliyun.com)

<sup>d</sup> Department of Chemical Engineering & Materials Science, Amrita Vishwa Vidyapeetham, Ettimadai, Coimbatore 641112, India

†\*Corresponding: [b\\_sankarprasad@cb.amrita.edu](mailto:b_sankarprasad@cb.amrita.edu); [junfengzhang78@aliyun.com](mailto:junfengzhang78@aliyun.com)

‡These authors contributed equally to this work.

## Materials, methods and instrumentations

Resorufin (TCI), 2-(Diphenylphosphino) benzoic acid (Alfa-aesar), HATU (Alfa-aesar), DIPEA (Alfa- aesar), DMF (Aldrich), Diethyl ether (Loba chem., India), Angeli's salt ( $\text{Na}_2\text{N}_2\text{O}_3$ , Cayman Chemical) and DCM (Loba chem. India) were purchased commercially and used without further purification. Analytical thin layer chromatography was performed using silica gel 60 (pre coated sheets with 0.25 mm thickness). Mass spectra were recorded on anion SpecHiRes ESI mass spectrometer. NMR spectra were collected on a 400 MHz spectrometer (Bruker, Germany).

## Reaction Scheme:

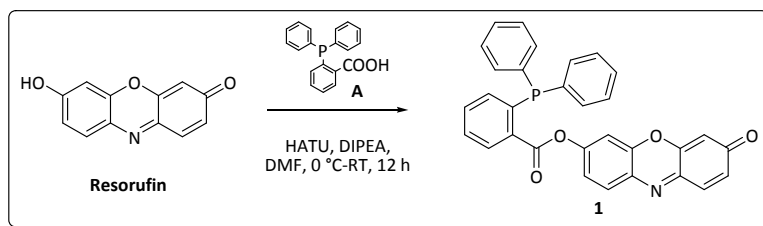

## Synthesis of probe 1

To a solution of 2-(diphenylphosphino) benzoic acid (287 mg, 0.938 mmol) in DMF (10 mL) at 0°C DIPEA (0.19 mL, 1.05 mmol), resorufin (200 mg, 0.938 mmol) and HATU (375 mg, 0.985 mmol) were added. The reaction was continued to stir for 12 h at RT. The reaction was monitored by TLC. After completion of reaction, reaction mixture was diluted with water and stirred for 15 min. The precipitated solid was filtered, washed with water and dried in vacuo. The crude product was purified by column chromatography on neutral alumina using ethyl acetate in hexane (3:7) as eluent to obtain probe, **1** as pale brown solid (260 mg; 55.31 %).  $^1\text{H-NMR}$  (400 MHz,  $\text{CDCl}_3$ ):  $\delta$  8.24 (q, 1H); 7.73 (d, 1H); 7.50 (t, 2H); 7.45 (d, 2H); 7.36-7.29 (m, 9H); 7.03-6.98 (m, 3H); 6.87-6.84 (dd, 1H); 6.32 (d, 2H).  $^{13}\text{C-NMR}$  (100 MHz,  $\text{DMSO-d}_6$ ): 186.21, 164.62, 153.29, 149.89, 148.70, 144.42, 137.45, 137.36, 135.60, 135.19, 134.30, 134.11, 133.94, 133.76, 131.88, 131.58, 131.29, 129.60, 129.45, 129.35, 129.29, 119.90, 110.31, 106.53. ESI-HRMS  $m/z$  ( $\text{M}+\text{H}$ ): calcd. 501.110, found 502.125

### **Absorption and fluorescence studies**

All fluorescence and UV-Visible spectra were obtained with F-4500 FL spectrometer with a 1 cm standard quartz cell and UV-1800 spectrophotometer, respectively. Angeli's salt ( $\text{Na}_2\text{N}_2\text{O}_3$ ) was used as the source of HNO, because it decomposes rapidly ( $t_{1/2} = 3$  min) in aqueous solutions at pH = 7 to produce HNO and  $\text{NaNO}_2$ .<sup>1</sup> Stock solutions (1 mM) of various analytes (HNO,  $\text{H}_2\text{O}_2$ ,  $\text{HO}^\cdot$ , GSH, NO,  $\text{NO}^-$ ,  $\text{NO}_2^-$ , GSNO, AA, NaOCl,  $\text{FeCl}_3$ ) were prepared in deionized water. The stock solution of probe, 1 was prepared in PBS buffer (pH = 7.4) with 20% DMSO. Excitation was carried out at 530 nm with excitation and emission slit widths is 3 nm each. The Fluorescence experiments (solution test) of probe, 1 (5.0  $\mu\text{M}$ ) recorded in the presence of increasing concentrations of HNO (0–25 eq.) in PBS buffer (pH = 7.4) with 20% DMSO. Probe, 1 was incubated with HNO for 30 min at 37 °C. The quantum yield of the probe 1 in presence and absence of HNO were measured in sodium phosphate buffer (pH 5.0 or 7.4). For determination of each  $\Phi_F$  fluorescein in 0.1 N NaOH ( $\Phi_F = 0.79$ ) was used as a fluorescence standard.

### **Culture of CHO cells and Fluorescent Imaging**

CHO was cultured in Dulbecco's modified Eagle's medium (DMEM, Invitrogen) supplemented with 10% FBS (fetal bovine serum) in an atmosphere of 5% $\text{CO}_2$  and 95% air at 37 °C. The cells were seeded in 24-well flat-bottomed plates and then incubated for 24 h at 37 °C under 5% $\text{CO}_2$ . Then the cells were incubated with 75.0  $\mu\text{M}$ , 125  $\mu\text{M}$  of AS an atmosphere of 5%  $\text{CO}_2$  and 95% air for 2 h at 37 °C, respectively. Then the cells were incubated with 5.0  $\mu\text{M}$  probe, 1 in PBS for 1h .Washed the cells twice with 1mL deionized water at room temperature, Cells were imaged using an Olympus BX51 inverted fluorescence microscopy.

### **Culture of *C. elegans* and Fluorescent Imaging**

The *C. elegans* wild type strain N<sub>2</sub> was acquired from the Key Biological Laboratory Center (Yunnan University). The larval stage 4 (L4) *C. elegans* was used. The L4 stage nematodes were washed three times with deionized water by centrifugation at 2500 rpm for 2 minutes. For imaging of accumulations of HNO (AS) in the nematode, the previously exposed worms were incubated in centrifuge tube filled with 2 mL of deionized water, containing 5  $\mu\text{M}$  (in PBS) of

probe **1** at 20 °C for 1 h. Again the nematodes were washed three times with deionized water by centrifuging at 2500 rpm for 2 minutes before being mounted onto a slide glass.

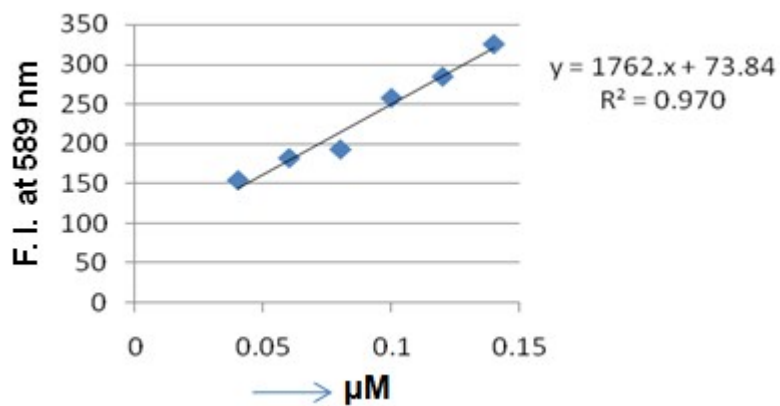

**Fig.S1** Fluorescence intensity of the probe, **1** (5 µM) normalized for the minimum fluorescence intensity in the absence or presence of HNO. Excitation was effected at 565 nm and emission at 590 nm with the excitation and emission slit widths both set at 3 nm.

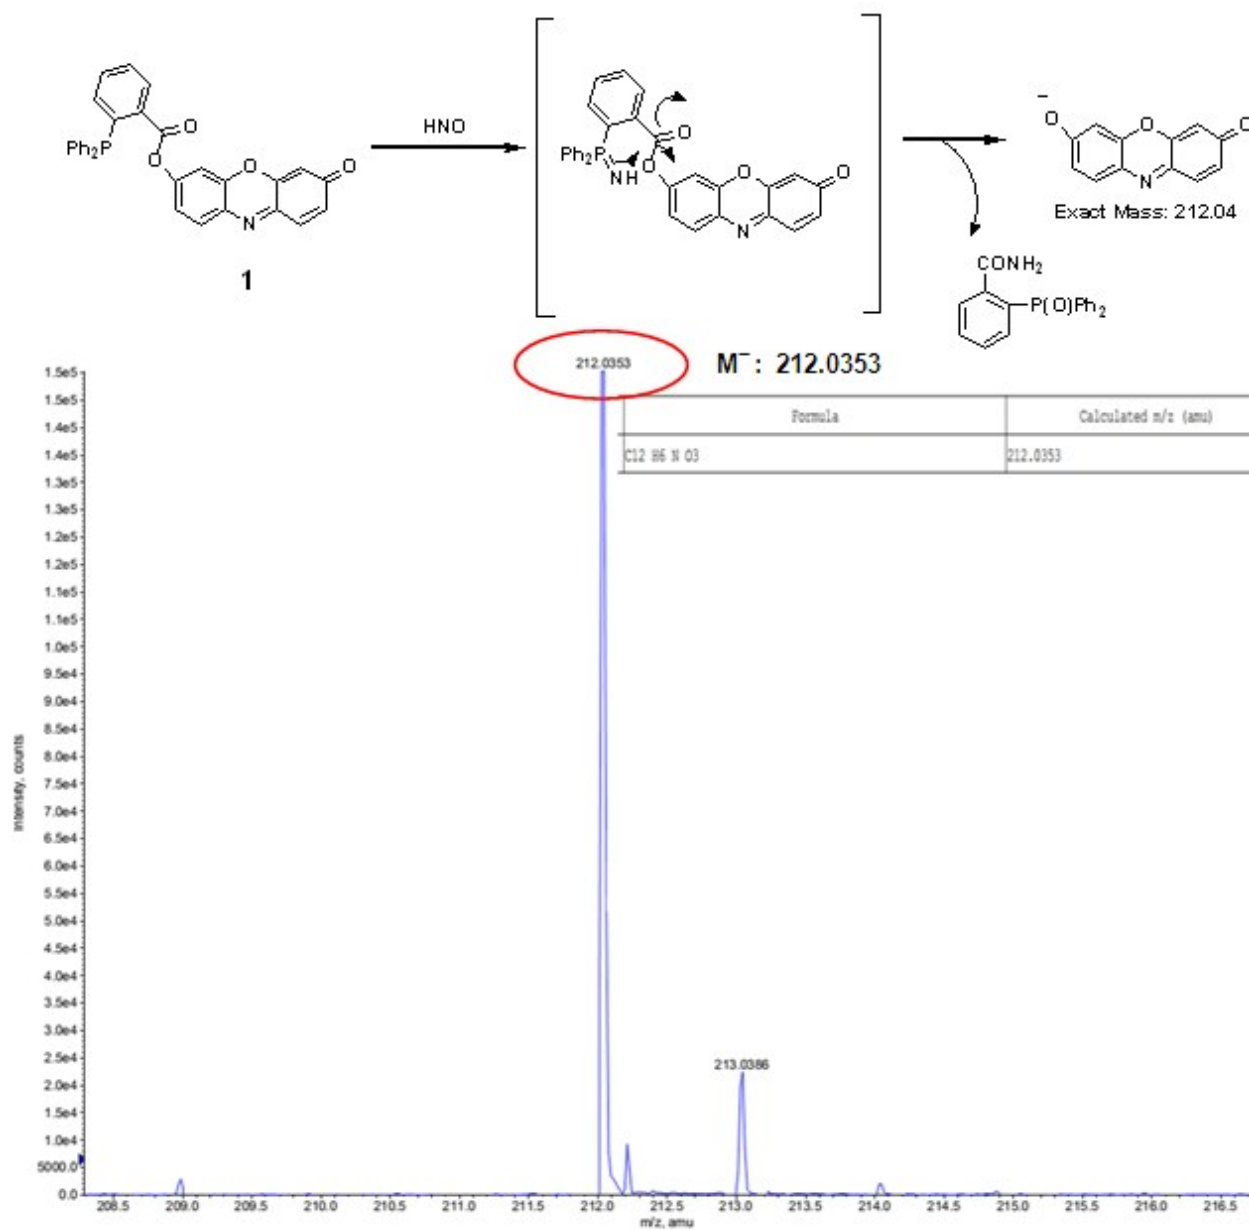

**Fig.S2** The HRMS spectra was recorded after 5 mg of probe, **1** in 5ml DMSO-PBS buffer (V/V=1:4) in HNO atmosphere for 1h. HRMS (ESI): calcd for C<sub>12</sub>H<sub>6</sub>NO<sub>3</sub>=212.0353, found *m/z* 212.0353.

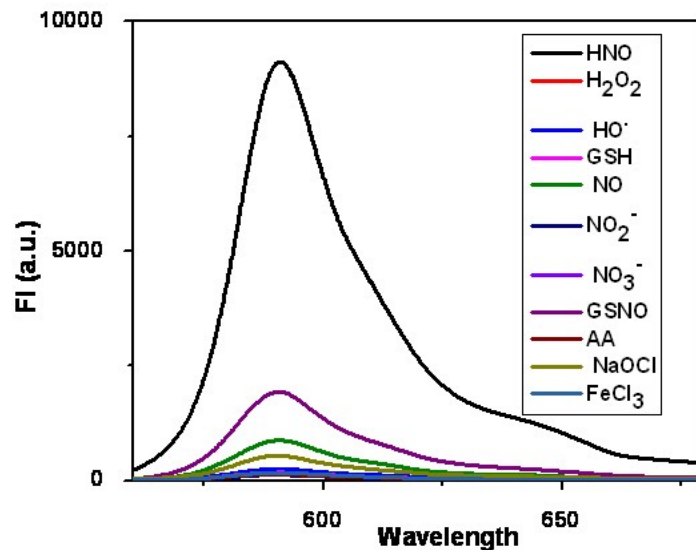

**Fig.S3.** Fluorescence responses of probe, **1** (5  $\mu$ M) in presence of various analytes in aqueous buffer solutions (in PBS, 20% DMSO) at 37  $^{\circ}$ C. Excitation was effected at 565 nm with the excitation and emission slit widths both set at 3 nm.

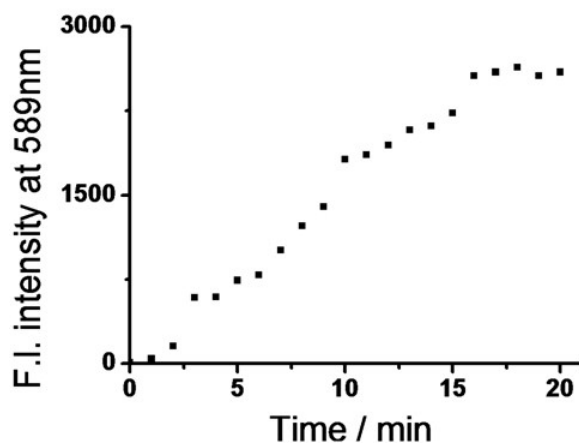

**Fig.S4** Time-trace plots of HNO monitored by the emission of 589 nm. Probe, **1** (5  $\mu$ M) in PBS buffer with 20% DMSO in HNO (100  $\mu$ M) atmosphere, excitation at 565 nm with the excitation and emission slit widths both set at 1.5 nm.

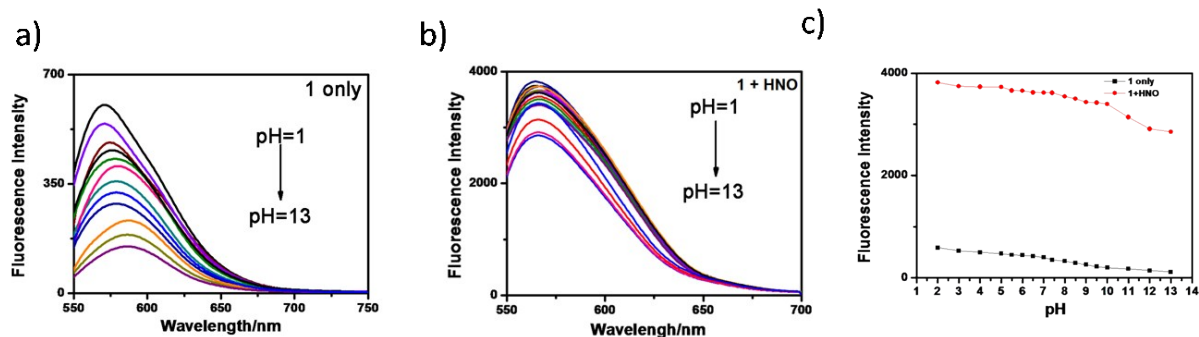

**Fig.S5.** Changes of fluorescence intensity of probe, **1** ( $05 \mu\text{M}$ ) in variable pH (1-13) ( $\Phi_F = 0.012$ ) in absence (a) and in presence (b) of HNO ( $50 \mu\text{M}$ ); c) Pattern of fluorescence intensity of probe **1** in presence and absence of HNO. Excitation at 565 nm, emission at 595 nm in PBS buffer (10 mM) with 1 % DMSO. (Slit widths: ex 1.5 / em 1.5)

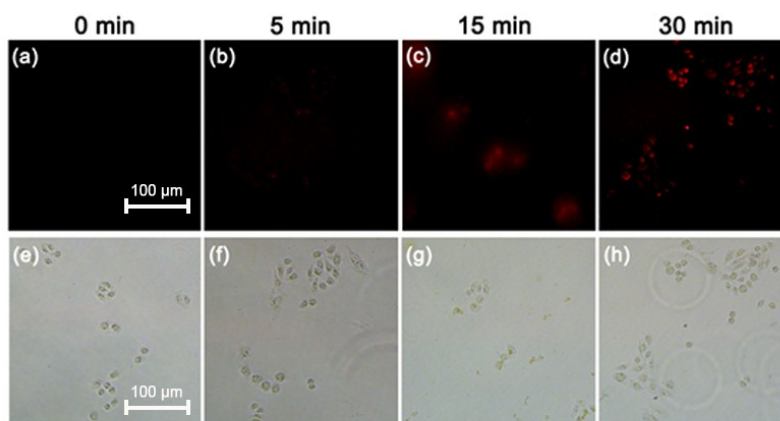

**Fig.S6** Time tracking of fluorescent imaging (top) and phase contrast (bottom) for HNO ( $125 \mu\text{M}$ ) in CHO cells. (a) 0 min; (b) 5 min; (c) 15 min; (d) 30 min. All images share the same scale bar (100  $\mu\text{m}$ ). Cells were using excitation wave length of 540 nm and emission length of 570-630 nm.

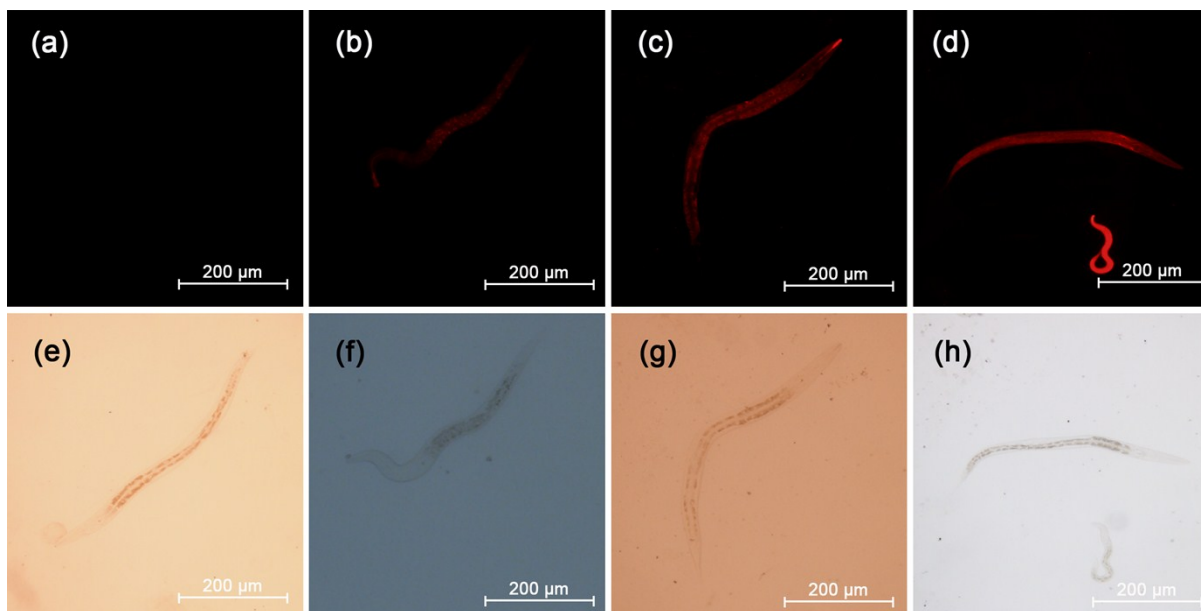

**Fig.S7** Fluorescent imaging (top) and phase contrast (bottom) for HNO in *C. elegans*. (a) Probe, **1** (5  $\mu$ M in PBS), HNO (AS) (300  $\mu$ M), 0min; (b) Probe **1** (5  $\mu$ M), HNO (AS) (300  $\mu$ M), 30min; (c) Probe, **1** (5  $\mu$ M), HNO (As) (300  $\mu$ M), 60 min; (d) Probe **1** (5  $\mu$ M), HNO (300  $\mu$ M), 90min. *C. elegans* images were obtained using an Olympus BX51 inverted fluorescence microscopy. All images share the same scale bar (200  $\mu$ M). Cells were using excitation wave length of 540 nm and emission length of 570-630 nm.



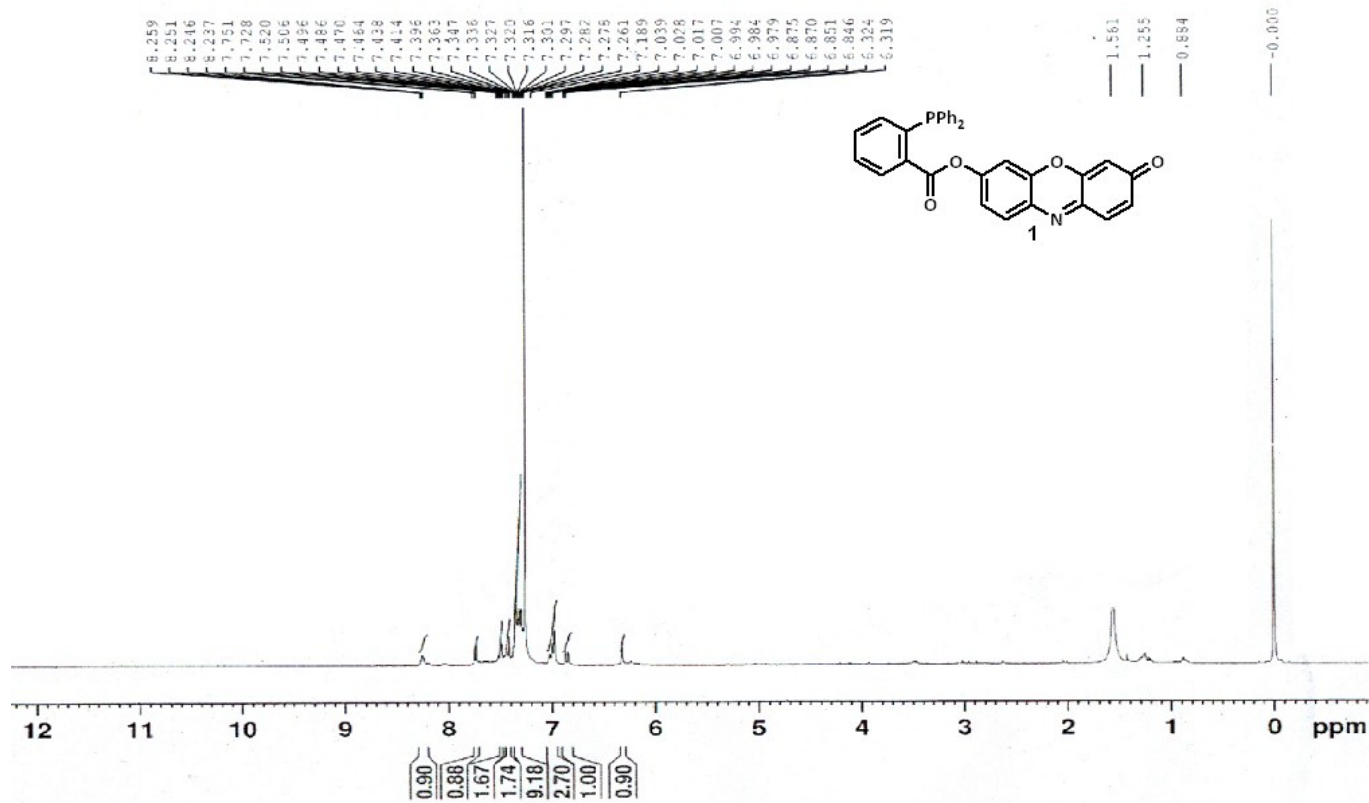

Fig.S8 <sup>1</sup>H-NMR of 1 in CDCl<sub>3</sub>

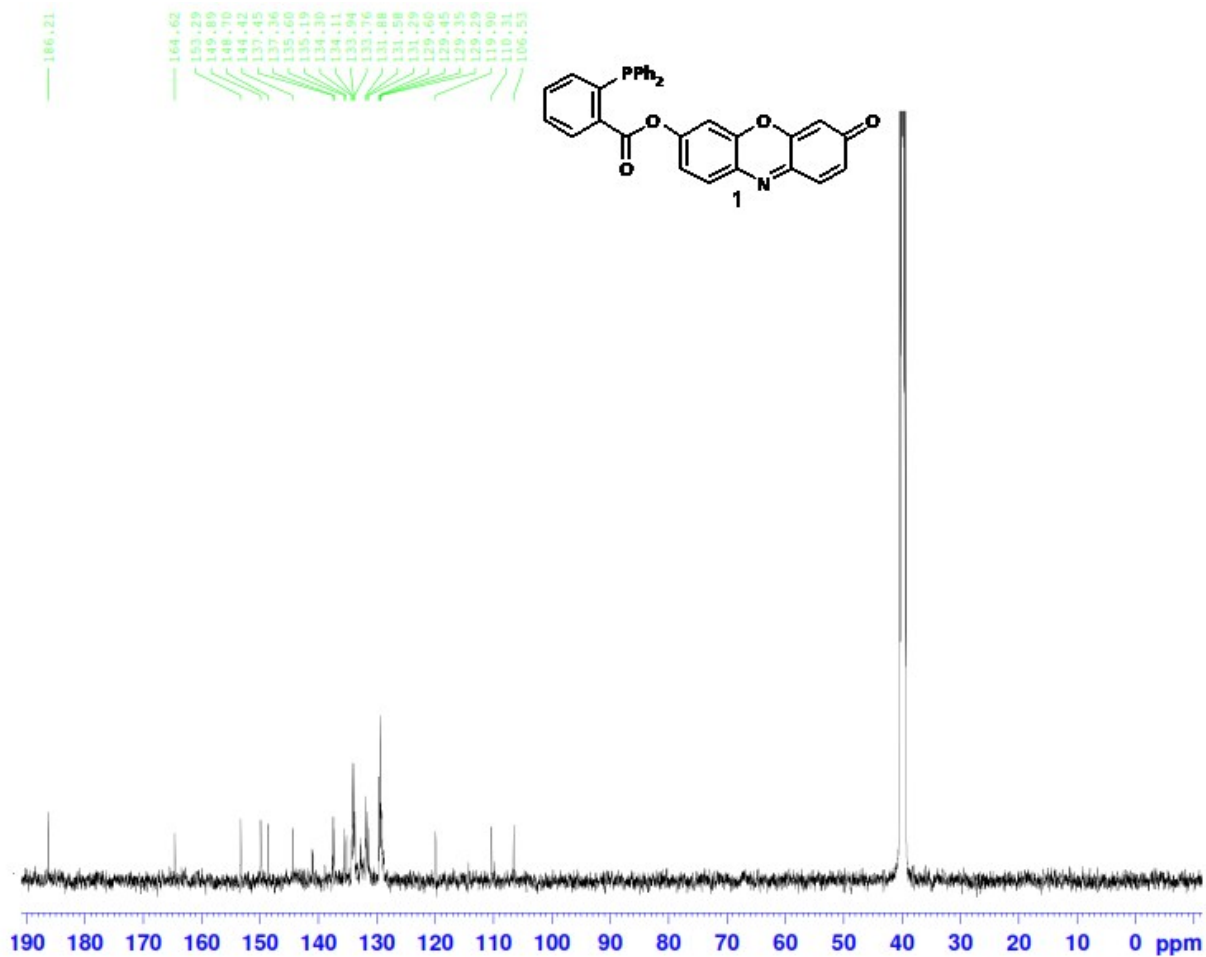

Fig. S9  $^{13}\text{C}$ -NMR of **1** in  $\text{DMSO-d}_6$

NGTIENAN2 #132 RT: 1.29 AV: 1 NL: 1.31E8  
TMS + c ESI+M=35.00 F11ms2 502.12@ lod0.00 [499.00-505.00]

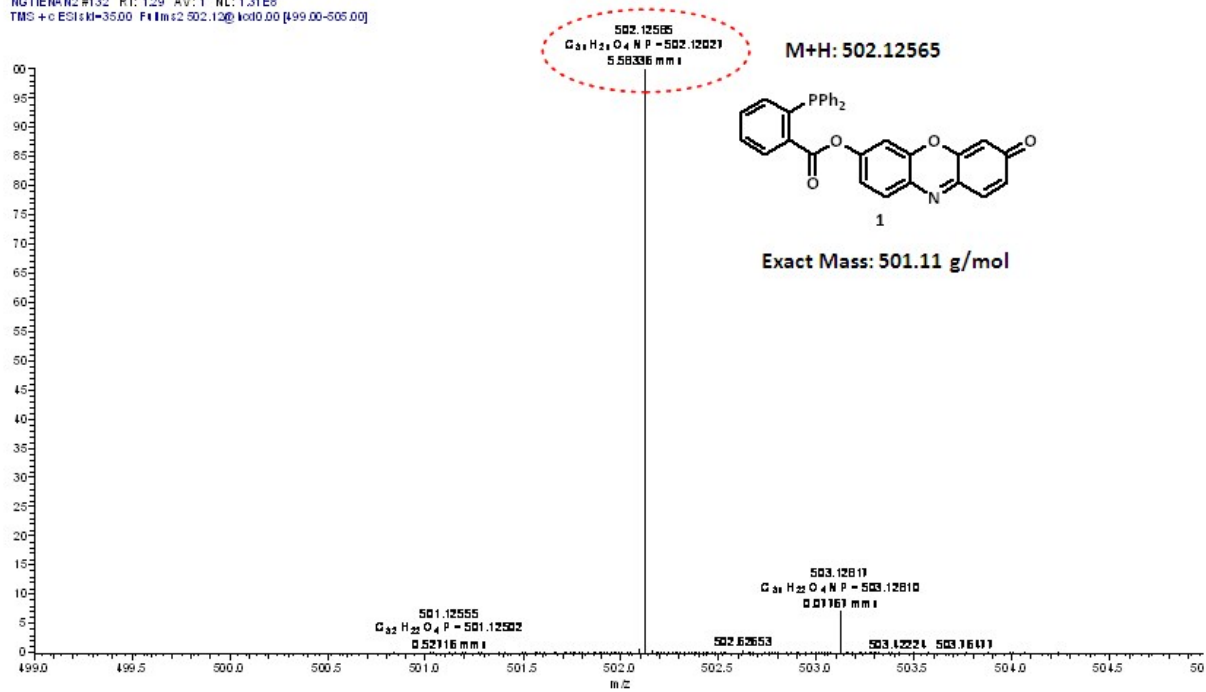

**Fig.S10 HRMS of 1**

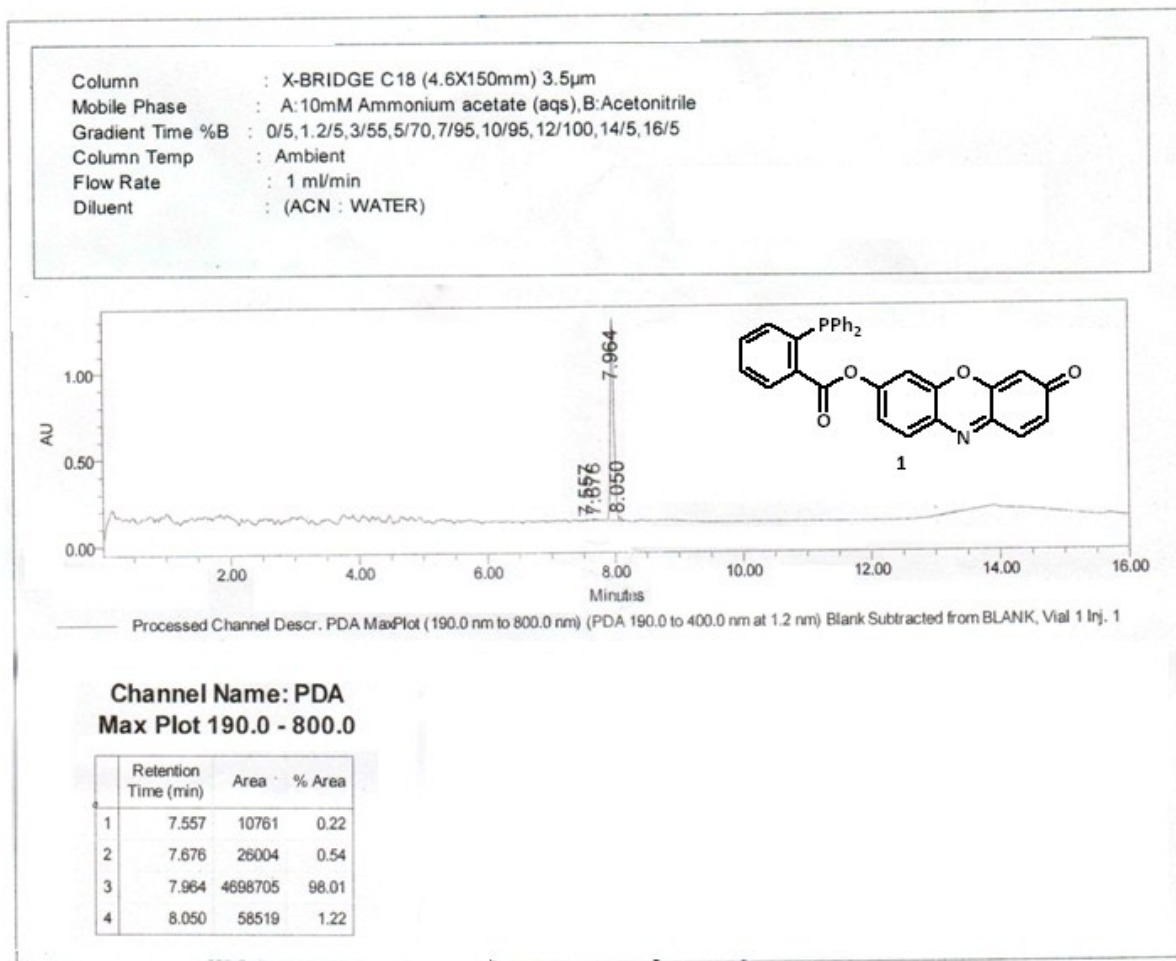

**Fig.S11 HPLC of 1**

## References

- (a) K. M. Miranda, H. T. Nagasawa and J. P. Toscano, *Curr.Top. Med. Chem.*, 2005, **5**, 649–664; (b) A. S. Dutton, J. M. Fukuto and K. N. Houk, *J. Am. Chem. Soc.*, 2004, **126**, 3795–3800.
